# Supplementary material for: NF-κB and TNF Affect the Astrocytic Differentiation from Neural Stem Cells
Source: PubMed Central journal article supplement (PMC8068246; doi:10.3390/cells10040840), 2021-04-08
Supplement: cells-10-00840-s001.pdf [file cells-10-00840-s001.pdf]

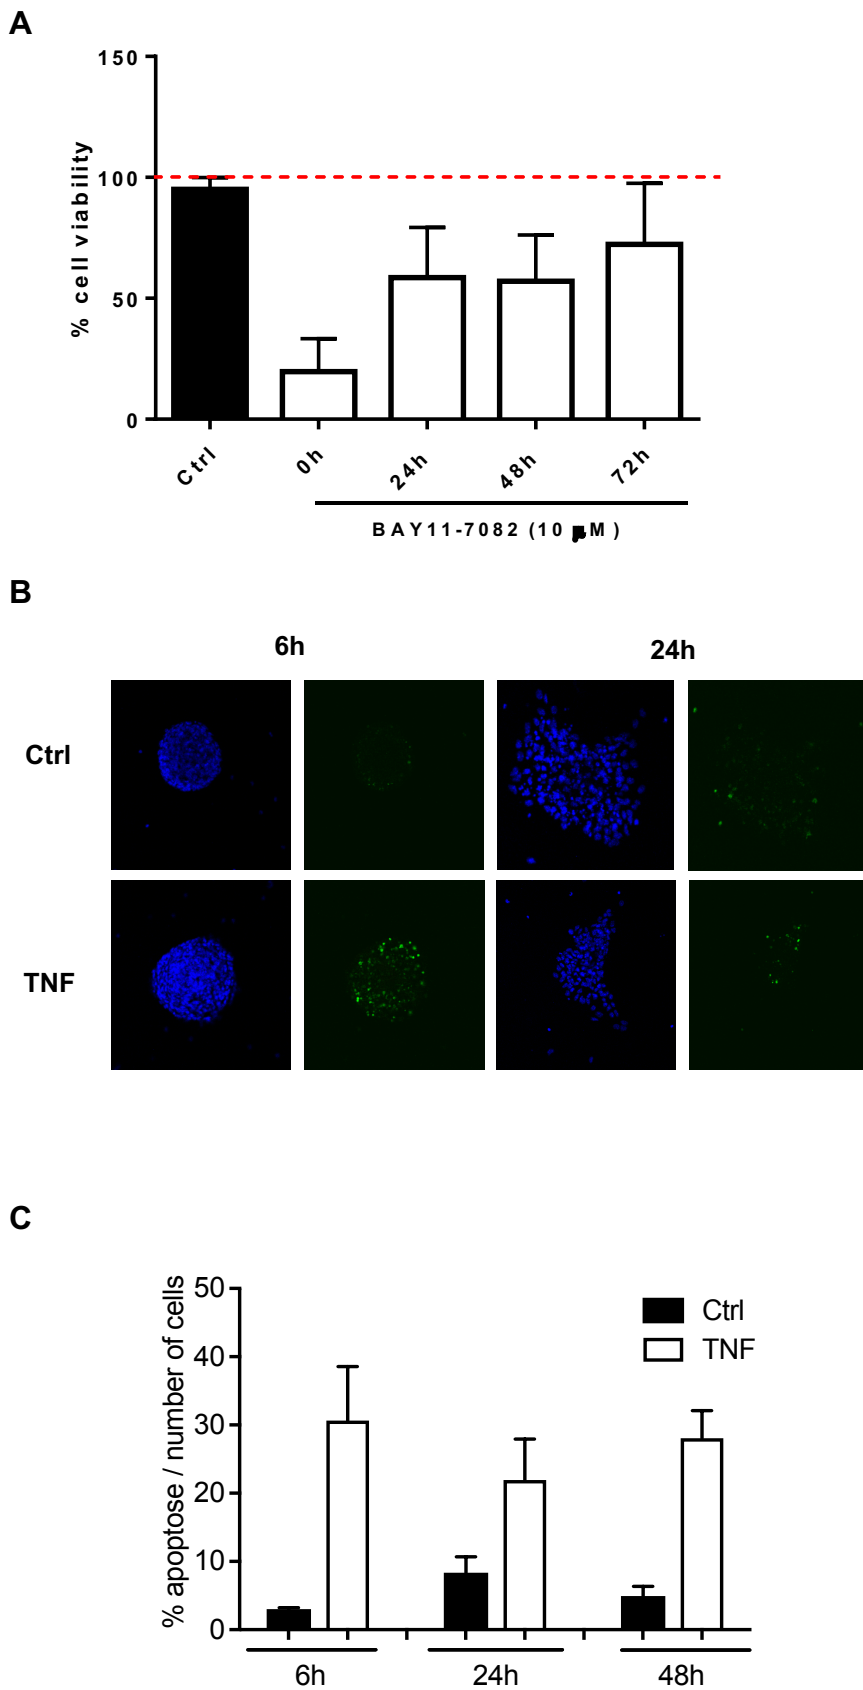

**S1.** A: Cell viability assessed by a MTT assay of NSP-derived astrocytes after 96h of differentiation with BAY11-7082 (mean±SEM). BAY11-7082 (10mM) was added at different time during astrocytic differentiation (0, 24, 48, 72h). B: TUNEL assay measuring TNF-induced cell death. Nuclei were stained with DAPI (blue) and TUNEL positive cells display green nuclei. Scale bar: 50 μm. C: Quantification of TUNEL positive cells for each condition (FCS, TNF) at 6, 24, and 48h. The percentage of TUNEL positive cells is represented relative to the total number of cells.

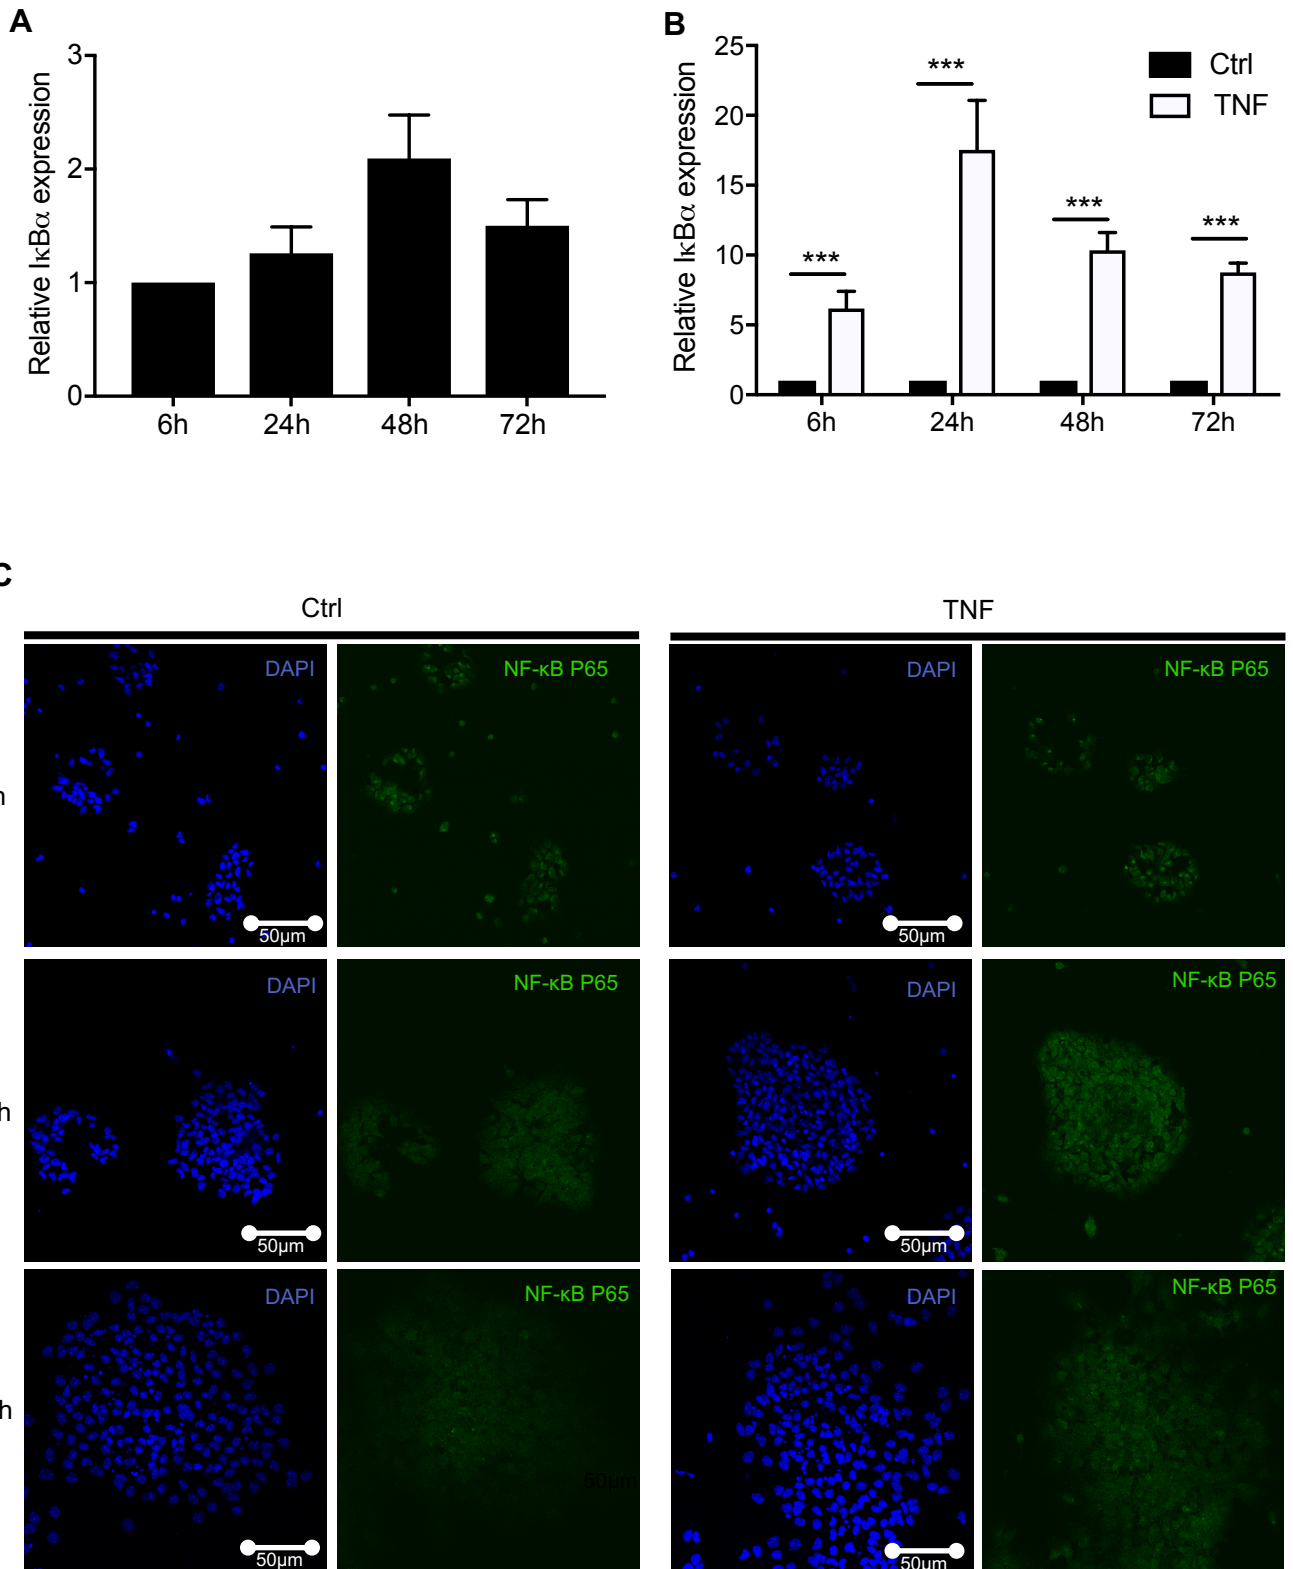

**S2.** A: kinetic of *IκBα* mRNA expression obtained by microarrays analyses (n=3). B: Activation of the NF-κB pathway by TNF. Effect of TNF treatment on *IκBα* gene expression obtained by RT-PCR. Each time point is normalized to its FBS control (=1). Results are given as mean ± SEM of 3 independent experiments. \*\*\*p<0,001. C: Immunocytochemistry showing NF-κB P65 protein expression (green) in TNF treated cells at 3, 6, and 24h. Nuclei were counterstained by DAPI (blue). Scale bar: 50 μm.

TNF versus FBS

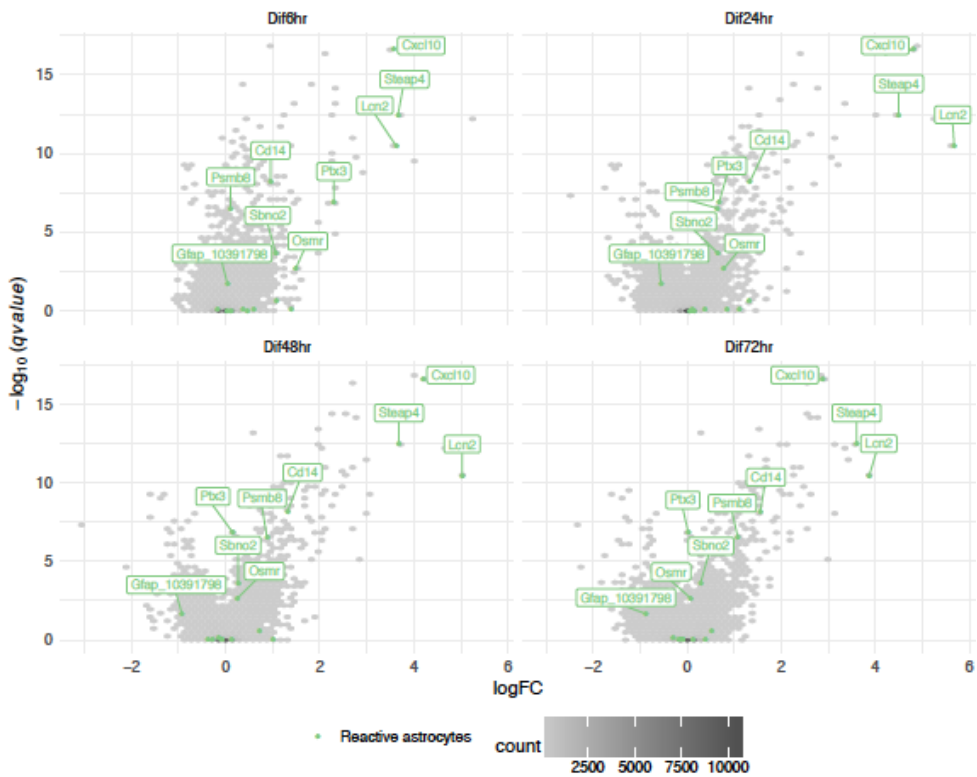

TNF versus FBS

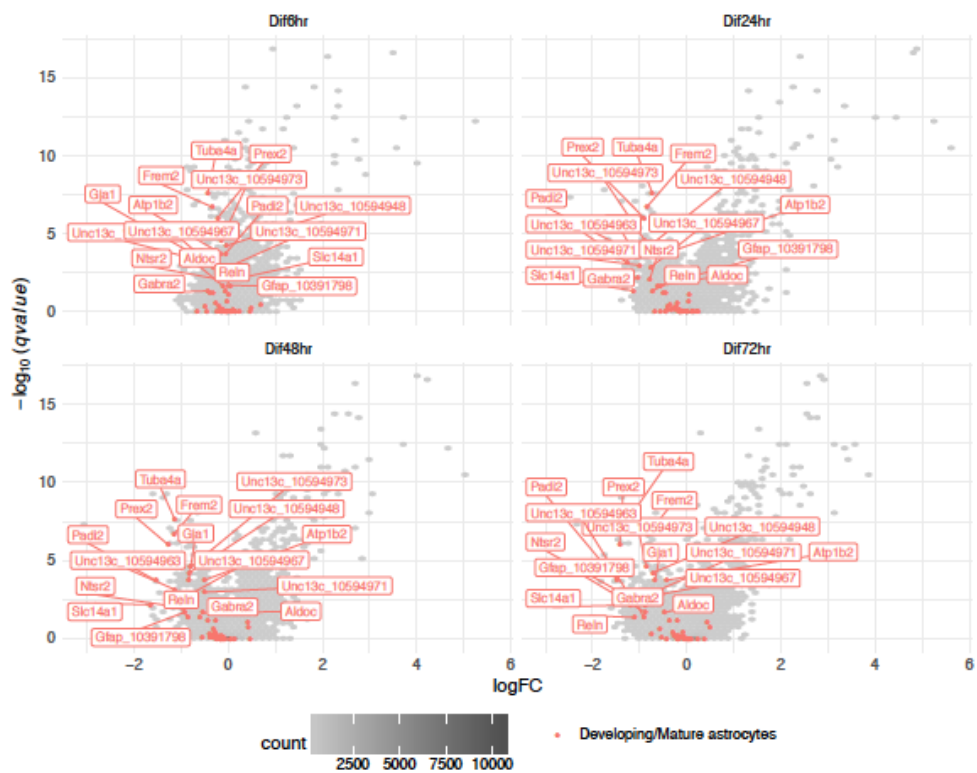

**S3.** Volcano plots for the 4 contrast analyses. Scatter plots of the  $-\log_{10}(q\text{ value})$  in function of the  $\log_2$  fold change of the TNF stimulation compared to the FBS. All genes are binned into 60 bins and respective counts are displayed according to the grey gradient in the legend. Genes belonging to either the Developing/Mature astrocytes or Reactive astrocytes pathways are highlighted as an extra colored dot payer. The list was realized after a compilation of the publication by Cahoy et al.2008, Molofsky et al. 2012, Zhang et al. 2016 and the database from Network glia (<http://www.networkglia.eu/en/astrocyte>). Gene symbols for those pathways are displayed only if their  $q\text{-value}$  is  $< 0.05$  ( $1.30103$  as  $-\log_{10}$ ). Genes with more than 1 probeset have the probeset id appended to their gene symbol. For example, *Unc13c* has 7 probeset ids and 10594971 is one probeset with a  $q\text{-value}$   $< 0.05$ .

| gene_symbol     | q_value     | pathways                     | Dif6hr       | Dif24hr      | Dif48hr      | Dif72hr      |
|-----------------|-------------|------------------------------|--------------|--------------|--------------|--------------|
| Aldoc           | 0,023195509 | Developing/Mature astrocytes | -0,108484194 | -0,623772411 | -0,547190474 | -0,472335783 |
| Atp1b2          | 1,83E-04    | Developing/Mature astrocytes | -0,165389993 | -0,444164308 | -0,507112606 | -0,424009581 |
| Cd109           | 0,999999963 | Reactive astrocytes          | 0,11323992   | 0,057332967  | -0,373162425 | -0,12913325  |
| Cd14            | 6,47E-09    | Reactive astrocytes          | 0,952756851  | 1,330993718  | 1,31578106   | 1,556442661  |
| Cd44            | 0,839094887 | Reactive astrocytes          | 0,594023698  | 0,380250744  | 0,129470256  | -0,097077418 |
| Col1a1          | 0,999999963 | Developing/Mature astrocytes | -0,086822048 | 0,237944192  | -0,113957697 | 0,063282724  |
| Cxcl10          | 2,51E-17    | Reactive astrocytes          | 3,568915223  | 4,801955216  | 4,192875129  | 2,877559571  |
| Dusp14          | 0,999999963 | Developing/Mature astrocytes | -0,07455089  | -0,102142578 | -0,161438615 | -0,193615697 |
| Emp1_10542355   | 0,946762837 | Developing/Mature astrocytes | 0,463650289  | 0,147685468  | -0,382328077 | -0,174503339 |
| Emp1_10542355   | 0,946762837 | Reactive astrocytes          | 0,463650289  | 0,147685468  | -0,382328077 | -0,174503339 |
| Epha5           | 0,516860114 | Developing/Mature astrocytes | -0,493108044 | -0,403620425 | -0,397310234 | -0,749095731 |
| Fbln5           | 0,999999963 | Reactive astrocytes          | 0,029605152  | 0,059593798  | -0,085957652 | -0,091806005 |
| Fgfr3           | 0,999999963 | Developing/Mature astrocytes | -0,052936426 | -0,143982654 | -0,251702461 | -0,016595649 |
| Frem2           | 2,03E-07    | Developing/Mature astrocytes | -0,338654914 | -0,850897417 | -1,148976612 | -0,826826465 |
| Frmf3           | 0,999999963 | Developing/Mature astrocytes | 0,154966566  | -0,016409864 | -0,145523115 | -0,427044569 |
| Fzd3            | 0,274443906 | Developing/Mature astrocytes | -0,266443594 | -0,195926426 | -0,318756268 | -0,571534535 |
| Gabra2          | 0,047436228 | Developing/Mature astrocytes | -0,439741303 | -1,129289114 | -0,60450402  | -0,90957834  |
| Gfap_10391798   | 0,021276084 | Developing/Mature astrocytes | 0,039681579  | -0,558800917 | -0,930691328 | -0,88292039  |
| Gfap_10391798   | 0,021276084 | Reactive astrocytes          | 0,039681579  | -0,558800917 | -0,930691328 | -0,88292039  |
| Gja1            | 1,96E-04    | Developing/Mature astrocytes | -0,752338454 | -1,103180902 | -0,845013904 | -0,677242995 |
| Glul_10350753   | 0,198930992 | Developing/Mature astrocytes | -0,024021602 | 0,040009454  | 0,429687265  | 0,494593776  |
| Glul_10374453   | 0,09265359  | Developing/Mature astrocytes | 0,009618488  | 0,054502628  | 0,409513533  | 0,437311928  |
| Gmpr            | 0,999999963 | Developing/Mature astrocytes | -0,186798541 | 0,104878478  | 0,039973891  | 0,021498544  |
| Gstm7           | 0,999999963 | Developing/Mature astrocytes | 0,048628928  | 0,107813828  | 0,4670492    | 0,234856507  |
| Icam1           | 0,929366505 | Reactive astrocytes          | -0,174991801 | 0,10825111   | -0,282214442 | 0,12217262   |
| Igfbp3          | 0,8393156   | Reactive astrocytes          | 0,370033894  | 0,847058014  | 1,002397817  | 0,385455396  |
| Kcnj10          | 0,066859121 | Developing/Mature astrocytes | -0,382197045 | -0,494236343 | -0,434509691 | -0,363093231 |
| Lon2            | 3,46E-11    | Reactive astrocytes          | 3,628806392  | 5,677163393  | 5,026584035  | 3,8704022    |
| Nes             | 0,999999963 | Developing/Mature astrocytes | 0,233914798  | 0,216687266  | -0,09941952  | -0,206515185 |
| Npnt            | 0,929748851 | Developing/Mature astrocytes | 0,045843065  | -0,452159351 | -0,548772752 | -0,536296748 |
| Nsg2            | 0,9223006   | Developing/Mature astrocytes | -0,456431724 | -0,562635165 | -0,201158034 | -0,121452717 |
| Ntsr2           | 0,008443307 | Developing/Mature astrocytes | -0,21355212  | -0,78207007  | -1,2032149   | -0,877545471 |
| Osmr            | 0,002272318 | Reactive astrocytes          | 1,48503663   | 0,772843115  | 0,251647703  | 0,078315577  |
| Padi2           | 1,89E-04    | Developing/Mature astrocytes | -0,058290586 | -1,099136288 | -1,540428933 | -1,479488545 |
| Prex2           | 9,86E-07    | Developing/Mature astrocytes | -0,2237412   | -0,906643533 | -1,275639969 | -1,425938936 |
| Prkar2b         | 0,825920217 | Developing/Mature astrocytes | -0,111068409 | -0,411678258 | -0,302372065 | -0,041667048 |
| Psmb8           | 3,08E-07    | Reactive astrocytes          | 0,107290647  | 0,643844805  | 0,879011589  | 1,077695267  |
| Ptx3            | 1,41E-07    | Reactive astrocytes          | 2,297396096  | 0,676420733  | 0,148441408  | 0,022025132  |
| Reln            | 0,046041569 | Developing/Mature astrocytes | -0,067288725 | -0,723659223 | -0,856199171 | -1,112090868 |
| Sbno2           | 2,22E-04    | Reactive astrocytes          | 1,064710669  | 0,655731052  | 0,265435503  | 0,286492368  |
| Sema5b          | 0,999999963 | Developing/Mature astrocytes | 0,095619863  | 0,009761776  | 0,121515455  | 0,378171179  |
| Sema6a          | 0,999999963 | Developing/Mature astrocytes | -0,134943283 | -0,126672327 | -0,074411287 | 0,029221035  |
| Serpina3n       | 0,769250263 | Reactive astrocytes          | 1,388622609  | 1,105633488  | -0,150457168 | -0,299921643 |
| Sertad4         | 0,839161609 | Developing/Mature astrocytes | 0,105530715  | -0,154216604 | -0,366085339 | -0,085808549 |
| Slc14a1         | 0,007065097 | Developing/Mature astrocytes | 0,265770253  | -1,032900405 | -1,650709433 | -1,194332261 |
| Slc1a3          | 0,999999963 | Developing/Mature astrocytes | -0,035313669 | -0,007936636 | 0,041972056  | 0,082646699  |
| Sncap           | 0,999999963 | Developing/Mature astrocytes | -0,66264623  | -0,684990191 | -0,165283913 | 0,044700258  |
| Socs2_10372069  | 0,624926189 | Developing/Mature astrocytes | 0,490909306  | -0,271579894 | -0,338149619 | -0,178557393 |
| Socs2_10394674  | 0,400889115 | Developing/Mature astrocytes | 0,683409648  | -0,357672173 | -0,280764612 | -0,0760466   |
| Sox9            | 0,999999963 | Developing/Mature astrocytes | -0,240925432 | -0,160121724 | -0,169630381 | 0,011517347  |
| Steap4          | 3,57E-13    | Reactive astrocytes          | 3,662253704  | 4,497577306  | 3,683206899  | 3,601626521  |
| Timp1           | 0,241937205 | Reactive astrocytes          | 1,081626555  | 1,316150869  | 0,713994581  | 0,523350803  |
| Tmeff2          | 0,999999963 | Developing/Mature astrocytes | -0,021557006 | -0,168125798 | -0,122519575 | -0,054032295 |
| Tnfrsf21        | 0,434239628 | Developing/Mature astrocytes | -0,193423366 | -0,220575943 | -0,29667231  | -0,29146013  |
| Tspan6          | 0,918068842 | Developing/Mature astrocytes | -0,01930807  | -0,078114691 | -0,104875452 | -0,209567005 |
| Tuba4a          | 2,31E-08    | Developing/Mature astrocytes | -0,430536844 | -0,733299706 | -1,135862337 | -1,239616312 |
| Unc13c_10594948 | 6,08E-05    | Developing/Mature astrocytes | -0,044457075 | -0,785974933 | -0,828782454 | -0,713779887 |
| Unc13c_10594963 | 7,35E-04    | Developing/Mature astrocytes | -0,409568362 | -1,268369942 | -1,137256639 | -1,293493653 |
| Unc13c_10594965 | 0,757645166 | Developing/Mature astrocytes | -0,13683973  | -0,227059214 | -0,226650187 | -0,271133246 |
| Unc13c_10594967 | 0,001442012 | Developing/Mature astrocytes | -0,320622726 | -0,762487026 | -0,79814981  | -0,519198854 |
| Unc13c_10594969 | 0,744546005 | Developing/Mature astrocytes | -0,147024379 | -0,336111881 | -0,150082272 | -0,23096728  |
| Unc13c_10594971 | 0,001096841 | Developing/Mature astrocytes | 0,079094975  | -0,999198679 | -0,502218064 | -0,700149674 |
| Unc13c_10594973 | 2,74E-05    | Developing/Mature astrocytes | -0,147830462 | -0,8926765   | -0,80546068  | -0,858392972 |
| Wnt5a           | 0,063961884 | Developing/Mature astrocytes | -0,325981588 | -0,456145879 | -0,272639188 | -0,196401618 |

**S4.** Genes belonging to either the Developing/Mature astrocytes or Reactive astrocytes pathways. The list was realized after a compilation of the publication by Cahoy et al.2008, Molofsky et al. 2012, Zhang et al. 2016 and the database from Network glia (<http://www.networkglia.eu/en/astrocyte>).

**A**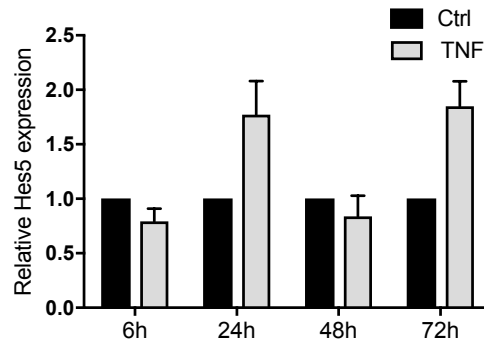**B**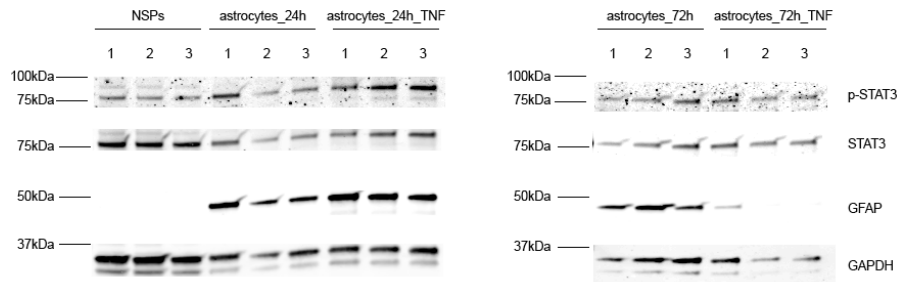**p-STAT3**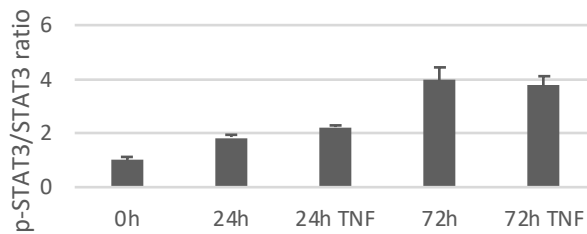**C**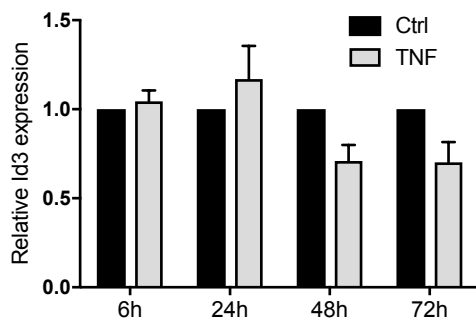**D**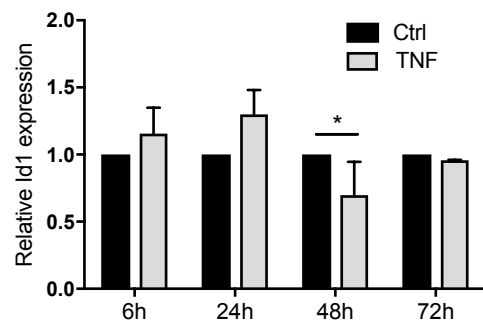

**S5.** Effect of TNF treatment on Hes5 (A), Id1 (C) and Id3 (D) genes expression obtained by RT-PCR. Each time point is normalized to its FBS control (=1). Results are given as mean  $\pm$  SEM (n=4). B: Immunoblots from TNF treated and untreated at 0, 24h and 72h of differentiation. p-STAT3 protein expression is not affected by TNF.
